# Supplementary material for: Online Information on Electronic Cigarettes: Comparative Study of Relevant Websites From Baidu and Google Search Engines
Source: PubMed Central journal article supplement (PMC7007591; doi:10.2196/14725), 2020-01-24
Supplement: jmir_v22i1e14725_app1.pdf [file jmir_v22i1e14725_app1.pdf]

## Supplemental Appendix 1: Data extraction form – assessment of web-based information on e-cigarettes

|                                                                                                                                                                                                                                                                            |                                                                                                                                                                                                                                                                                                                                                                                                                                                                                 |
|----------------------------------------------------------------------------------------------------------------------------------------------------------------------------------------------------------------------------------------------------------------------------|---------------------------------------------------------------------------------------------------------------------------------------------------------------------------------------------------------------------------------------------------------------------------------------------------------------------------------------------------------------------------------------------------------------------------------------------------------------------------------|
| <b>Who extract data?</b>                                                                                                                                                                                                                                                   | Name: _____                                                                                                                                                                                                                                                                                                                                                                                                                                                                     |
| <b>Search engine, web site # :</b>                                                                                                                                                                                                                                         | <input type="checkbox"/> Google, No.: _____ <input type="checkbox"/> Baidu, No: _____                                                                                                                                                                                                                                                                                                                                                                                           |
| <b>Access date:</b><br><b>Web site link:</b>                                                                                                                                                                                                                               | Access date: _____<br>http:// _____                                                                                                                                                                                                                                                                                                                                                                                                                                             |
| <b>Who runs the Web site?</b>                                                                                                                                                                                                                                              | <input type="checkbox"/> Government/public/university<br><input type="checkbox"/> Health institution<br><input type="checkbox"/> E-cig industry/commercial<br><input type="checkbox"/> Information services company<br><input type="checkbox"/> Charity/not-for-profit NGO<br><input type="checkbox"/> Other: _____<br><input type="checkbox"/> Unclear                                                                                                                         |
| <b>Organization or company name:</b>                                                                                                                                                                                                                                       |                                                                                                                                                                                                                                                                                                                                                                                                                                                                                 |
| <b>What types of information?</b><br>(Multiple choices allowed)                                                                                                                                                                                                            | <input type="checkbox"/> Health education<br><input type="checkbox"/> News<br><input type="checkbox"/> Advertisement<br><input type="checkbox"/> Consumer feedback<br><input type="checkbox"/> Other: _____<br><input type="checkbox"/> Unclear                                                                                                                                                                                                                                 |
| <b>Content coverage?</b>                                                                                                                                                                                                                                                   | What are e-cigs: <input type="checkbox"/> Yes; <input type="checkbox"/> No; <input type="checkbox"/> Unclear<br>E-cigs' harms: <input type="checkbox"/> Yes; <input type="checkbox"/> No; <input type="checkbox"/> Unclear<br>E-cigs for quitting: <input type="checkbox"/> Yes; <input type="checkbox"/> No; <input type="checkbox"/> Unclear<br>E-cig regulation: <input type="checkbox"/> Yes; <input type="checkbox"/> No; <input type="checkbox"/> Unclear<br>Other: _____ |
| <b>For advertisement websites:</b><br><b>Types of e-cigarettes:</b>                                                                                                                                                                                                        | <input type="checkbox"/> Cigalike –closed system<br><input type="checkbox"/> eGo - open system<br><input type="checkbox"/> Mod –APVs<br><input type="checkbox"/> Heat not burn product<br><input type="checkbox"/> Unclear/other: _____                                                                                                                                                                                                                                         |
| <b>Main messages and claims from the website:</b>                                                                                                                                                                                                                          |                                                                                                                                                                                                                                                                                                                                                                                                                                                                                 |
| <b>Smoking cessation claims:</b>                                                                                                                                                                                                                                           | <input type="checkbox"/> Help quit<br><input type="checkbox"/> Not help quit<br><input type="checkbox"/> Unclear/other: _____                                                                                                                                                                                                                                                                                                                                                   |
| <b>Health claims:</b>                                                                                                                                                                                                                                                      | <input type="checkbox"/> Healthier than tobacco cigarettes<br><input type="checkbox"/> More harmful than tobacco cigarettes<br><input type="checkbox"/> Unclear/other: _____                                                                                                                                                                                                                                                                                                    |
| <b>Social claims:</b><br>(Multiple choices allowed)                                                                                                                                                                                                                        | <input type="checkbox"/> Less expensive than tobacco cigarettes<br><input type="checkbox"/> Cleaner than tobacco cigarettes<br><input type="checkbox"/> More socially acceptable than tobacco cigarettes<br><input type="checkbox"/> Unclear/other: _____                                                                                                                                                                                                                       |
| <b>Age claims:</b>                                                                                                                                                                                                                                                         | <input type="checkbox"/> Not for children/young people<br><input type="checkbox"/> No age claims<br><input type="checkbox"/> Unclear/other: _____                                                                                                                                                                                                                                                                                                                               |
| <b>Any other notes/commentary:</b>                                                                                                                                                                                                                                         |                                                                                                                                                                                                                                                                                                                                                                                                                                                                                 |
| <b>Modified QUEST criteria/scores (range 0-28)</b> Reference for QUEST tool: Robillard JM, Jun JH, Lai JA, Feng TL. The QUEST for quality online health information: validation of a short quantitative tool. BMC medical informatics and decision making 2018; 18(1): 87. |                                                                                                                                                                                                                                                                                                                                                                                                                                                                                 |

|                                                            |                                                                                                                                                                                                                                                                                                                                                                                                                                                      |
|------------------------------------------------------------|------------------------------------------------------------------------------------------------------------------------------------------------------------------------------------------------------------------------------------------------------------------------------------------------------------------------------------------------------------------------------------------------------------------------------------------------------|
| <b>Authorship:</b><br><b>(Score x1):</b> _____             | 0- No indication of authorship or username<br>1- All other indications of authorship<br>2- Author's name and qualification clearly stated                                                                                                                                                                                                                                                                                                            |
| <b>Attribution (a):</b><br><b>(Score x3):</b> _____        | 0- No sources<br>1- Mention of expert source, research findings (though with insufficient information to identify the specific studies), links to various sites, advocacy body, or other<br>2- Reference to at least one identifiable scientific study, regardless of format (e.g., information in text, reference list)<br>3- Reference to mainly identifiable scientific studies, regardless of format (in >50% of claims)                         |
| <b>Attribution (b):</b><br><b>(Score x1):</b> _____        | For all articles scoring 2 or 3 on Attribution (a): Type of study<br>0- Not applicable; or in vitro, animal models, editorials<br>1- Single journal article (year: _____)<br>2- Multiple journal articles (most recent year: _____)<br>3- Systematic reviews of research studies (year: _____)                                                                                                                                                       |
| <b>Conflict of interest:</b><br><b>(Score x 3):</b> _____  | 0- High risk of conflict of interest<br>1- Unclear<br>2- Unbiased information                                                                                                                                                                                                                                                                                                                                                                        |
| <b>Currency:</b><br><b>(Score x 1):</b> _____              | Web site update date (month/year): _____<br>0- No date present<br>1- Article is dated but 1 years or older<br>2- Article is dated within the last 1 years                                                                                                                                                                                                                                                                                            |
| <b>Tone (includes title):</b><br><b>(Score x 3):</b> _____ | 0- Fully supported (authors fully and unequivocally support the claims, strong vocabulary, no discussion of limitations)<br>1- Mainly supported (authors mainly support their claims but with more cautious vocabulary such as "can reduce your risk" or "may help prevent", no discussion of limitations)<br>2- Balanced/cautious support (authors' claims are balanced by caution, includes statements of limitations and/or contrasting findings) |
| <b>Total score:</b> _____                                  | Any notes/Commentary:                                                                                                                                                                                                                                                                                                                                                                                                                                |
